# Supplementary material
Source: publisher figshare collection journal article supplement (https://acs.figshare.com/ndownloader/files/5068870)
Supplement: Supplementary file 1 [file 5068870]

  
data_complex 2 
  
_audit_creation_method            SHELXL-97 
_chemical_name_systematic 
; 
 ? 
; 
_chemical_name_common             ? 
_chemical_melting_point           ? 
_chemical_formula_moiety          ? 
_chemical_formula_sum 
 'C30 H28 Au Cl N P' 
_chemical_formula_weight          665.92 
  
loop_ 
 _atom_type_symbol 
 _atom_type_description 
 _atom_type_scat_dispersion_real 
 _atom_type_scat_dispersion_imag 
 _atom_type_scat_source 
 'C'  'C'   0.0033   0.0016 
 'International Tables Vol C Tables 4.2.6.8 and 6.1.1.4' 
 'H'  'H'   0.0000   0.0000 
 'International Tables Vol C Tables 4.2.6.8 and 6.1.1.4' 
 'N'  'N'   0.0061   0.0033 
 'International Tables Vol C Tables 4.2.6.8 and 6.1.1.4' 
 'P'  'P'   0.1023   0.0942 
 'International Tables Vol C Tables 4.2.6.8 and 6.1.1.4' 
 'Cl'  'Cl'   0.1484   0.1585 
 'International Tables Vol C Tables 4.2.6.8 and 6.1.1.4' 
 'Au'  'Au'  -2.0133   8.8022 
 'International Tables Vol C Tables 4.2.6.8 and 6.1.1.4' 
  
_symmetry_cell_setting            Monoclinic 
_symmetry_space_group_name_H-M    P2(1)/c 
  
loop_ 
 _symmetry_equiv_pos_as_xyz 
 'x, y, z' 
 '-x, y+1/2, -z+1/2' 
 '-x, -y, -z' 
 'x, -y-1/2, z-1/2' 
  
_cell_length_a                    9.595(3) 
_cell_length_b                    16.081(5) 
_cell_length_c                    17.189(5) 
_cell_angle_alpha                 90.00 
_cell_angle_beta                  92.575(5) 
_cell_angle_gamma                 90.00 
_cell_volume                      2649.4(14) 
_cell_formula_units_Z             4 
_cell_measurement_temperature     293(2) 
_cell_measurement_reflns_used     1003 
_cell_measurement_theta_min       2.70 
_cell_measurement_theta_max       24.06 
  
_exptl_crystal_description        ? 
_exptl_crystal_colour             ? 
_exptl_crystal_size_max           0.08 
_exptl_crystal_size_mid           0.06 
_exptl_crystal_size_min           0.06 
_exptl_crystal_density_meas       NONE 
_exptl_crystal_density_diffrn     1.669 
_exptl_crystal_density_method     'not measured' 
_exptl_crystal_F_000              1304 
_exptl_absorpt_coefficient_mu     5.733 
_exptl_absorpt_correction_type    MULTI-SCAN 
_exptl_absorpt_correction_T_min   0.822040 
_exptl_absorpt_correction_T_max   1.000000 
_exptl_absorpt_process_details    SADABS 
  
_exptl_special_details 
; 
 ? 
; 
  
_diffrn_ambient_temperature       293(2) 
_diffrn_radiation_wavelength      0.71073 
_diffrn_radiation_type            MoK\a 
_diffrn_radiation_source          'fine-focus sealed tube' 
_diffrn_radiation_monochromator   graphite 
_diffrn_measurement_device_type   'CCD area detector' 
_diffrn_measurement_method        'phi and omega scans' 
_diffrn_detector_area_resol_mean  ? 
_diffrn_standards_number          ? 
_diffrn_standards_interval_count  ? 
_diffrn_standards_interval_time   ? 
_diffrn_standards_decay_%         ? 
_diffrn_reflns_number             15061 
_diffrn_reflns_av_R_equivalents   0.0703 
_diffrn_reflns_av_sigmaI/netI     0.0908 
_diffrn_reflns_limit_h_min        -11 
_diffrn_reflns_limit_h_max        11 
_diffrn_reflns_limit_k_min        -19 
_diffrn_reflns_limit_k_max        20 
_diffrn_reflns_limit_l_min        -11 
_diffrn_reflns_limit_l_max        21 
_diffrn_reflns_theta_min          2.12 
_diffrn_reflns_theta_max          26.39 
_reflns_number_total              5415 
_reflns_number_gt                 3261 
_reflns_threshold_expression      >2sigma(I) 
  
_computing_data_collection        'Bruker SMART' 
_computing_cell_refinement        'Bruker SMART' 
_computing_data_reduction         'Bruker SAINT' 
_computing_structure_solution     'SHELXS-97 (Sheldrick, 1990)' 
_computing_structure_refinement   'SHELXL-97 (Sheldrick, 1997)' 
_computing_molecular_graphics     'Bruker SHELXTL' 
_computing_publication_material   'Bruker SHELXTL' 
  
_refine_special_details 
; 
 Refinement of F^2^ against ALL reflections.  The weighted R-factor wR and 
 goodness of fit S are based on F^2^, conventional R-factors R are based 
 on F, with F set to zero for negative F^2^. The threshold expression of 
 F^2^ > 2sigma(F^2^) is used only for calculating R-factors(gt) etc. and is 
 not relevant to the choice of reflections for refinement.  R-factors based 
 on F^2^ are statistically about twice as large as those based on F, and R- 
 factors based on ALL data will be even larger. 
; 
  
_refine_ls_structure_factor_coef  Fsqd 
_refine_ls_matrix_type            full 
_refine_ls_weighting_scheme       calc 
_refine_ls_weighting_details 
 'calc w=1/[\s^2^(Fo^2^)+(0.0197P)^2^+0.0000P] where P=(Fo^2^+2Fc^2^)/3' 
_atom_sites_solution_primary      direct 
_atom_sites_solution_secondary    difmap 
_atom_sites_solution_hydrogens    geom 
_refine_ls_hydrogen_treatment     mixed 
_refine_ls_extinction_method      none 
_refine_ls_extinction_coef        ? 
_refine_ls_number_reflns          5415 
_refine_ls_number_parameters      308 
_refine_ls_number_restraints      0 
_refine_ls_R_factor_all           0.1102 
_refine_ls_R_factor_gt            0.0511 
_refine_ls_wR_factor_ref          0.0763 
_refine_ls_wR_factor_gt           0.0650 
_refine_ls_goodness_of_fit_ref    1.012 
_refine_ls_restrained_S_all       1.012 
_refine_ls_shift/su_max           0.001 
_refine_ls_shift/su_mean          0.000 
  
loop_ 
 _atom_site_label 
 _atom_site_type_symbol 
 _atom_site_fract_x 
 _atom_site_fract_y 
 _atom_site_fract_z 
 _atom_site_U_iso_or_equiv 
 _atom_site_adp_type 
 _atom_site_occupancy 
 _atom_site_symmetry_multiplicity 
 _atom_site_calc_flag 
 _atom_site_refinement_flags 
 _atom_site_disorder_assembly 
 _atom_site_disorder_group 
Au1 Au 0.38191(3) 0.672372(18) 0.011216(16) 0.04806(10) Uani 1 1 d . . . 
Cl1 Cl 0.14415(18) 0.67888(14) -0.00383(12) 0.0772(6) Uani 1 1 d . . . 
P1 P 0.61456(17) 0.66611(12) 0.02223(9) 0.0402(4) Uani 1 1 d . . . 
N1 N 0.6728(5) 0.6176(3) 0.1022(3) 0.0389(13) Uani 1 1 d . . . 
C1 C 0.6979(7) 0.7666(4) 0.0265(4) 0.0396(16) Uani 1 1 d . . . 
C2 C 0.6467(7) 0.8286(5) 0.0748(4) 0.0552(18) Uani 1 1 d . . . 
H2 H 0.5665 0.8184 0.1018 0.066 Uiso 1 1 calc R . . 
C3 C 0.7124(9) 0.9041(5) 0.0831(4) 0.063(2) Uani 1 1 d . . . 
H3 H 0.6795 0.9436 0.1173 0.075 Uiso 1 1 calc R . . 
C4 C 0.8260(9) 0.9207(5) 0.0411(5) 0.072(2) Uani 1 1 d . . . 
H4 H 0.8678 0.9728 0.0450 0.087 Uiso 1 1 calc R . . 
C5 C 0.8796(8) 0.8622(5) -0.0064(5) 0.067(2) Uani 1 1 d . . . 
H5 H 0.9589 0.8736 -0.0337 0.080 Uiso 1 1 calc R . . 
C6 C 0.8147(8) 0.7854(5) -0.0136(4) 0.054(2) Uani 1 1 d . . . 
H6 H 0.8510 0.7456 -0.0463 0.065 Uiso 1 1 calc R . . 
C7 C 0.6811(7) 0.6181(4) -0.0628(4) 0.0433(17) Uani 1 1 d . . . 
C8 C 0.6396(8) 0.6469(4) -0.1362(5) 0.061(2) Uani 1 1 d . . . 
H8 H 0.5786 0.6918 -0.1403 0.073 Uiso 1 1 calc R . . 
C9 C 0.6854(9) 0.6117(6) -0.2028(5) 0.071(2) Uani 1 1 d . . . 
H9 H 0.6562 0.6325 -0.2513 0.086 Uiso 1 1 calc R . . 
C10 C 0.7750(9) 0.5452(5) -0.1972(5) 0.069(2) Uani 1 1 d . . . 
H10 H 0.8067 0.5210 -0.2423 0.083 Uiso 1 1 calc R . . 
C11 C 0.8180(8) 0.5141(5) -0.1261(5) 0.068(2) Uani 1 1 d . . . 
H11 H 0.8781 0.4688 -0.1225 0.082 Uiso 1 1 calc R . . 
C12 C 0.7705(7) 0.5515(4) -0.0588(4) 0.054(2) Uani 1 1 d . . . 
H12 H 0.8001 0.5308 -0.0103 0.065 Uiso 1 1 calc R . . 
C13 C 0.8206(6) 0.6234(4) 0.1305(4) 0.0462(18) Uani 1 1 d . . . 
H13A H 0.8747 0.6480 0.0901 0.055 Uiso 1 1 calc R . . 
H13B H 0.8564 0.5678 0.1404 0.055 Uiso 1 1 calc R . . 
C14 C 0.8403(7) 0.6758(5) 0.2059(4) 0.064(2) Uani 1 1 d . . . 
H14A H 0.8420 0.7344 0.1924 0.076 Uiso 1 1 calc R . . 
H14B H 0.7619 0.6666 0.2385 0.076 Uiso 1 1 calc R . . 
C15 C 0.9710(10) 0.6540(6) 0.2499(5) 0.109(4) Uani 1 1 d . . . 
H15A H 0.9688 0.5963 0.2642 0.164 Uiso 1 1 calc R . . 
H15B H 0.9801 0.6876 0.2960 0.164 Uiso 1 1 calc R . . 
H15C H 1.0489 0.6639 0.2180 0.164 Uiso 1 1 calc R . . 
C16 C 0.5989(7) 0.5418(4) 0.1269(4) 0.0442(18) Uani 1 1 d . . . 
H16A H 0.6404 0.4937 0.1030 0.053 Uiso 1 1 calc R . . 
H16B H 0.5022 0.5450 0.1081 0.053 Uiso 1 1 calc R . . 
C17 C 0.6036(7) 0.5298(4) 0.2134(4) 0.0412(17) Uani 1 1 d . . . 
C18 C 0.6948(7) 0.4694(4) 0.2495(4) 0.0468(18) Uani 1 1 d . . . 
C19 C 0.7884(8) 0.4198(4) 0.2088(5) 0.058(2) Uani 1 1 d . . . 
H19 H 0.7885 0.4234 0.1549 0.069 Uiso 1 1 calc R . . 
C20 C 0.8788(9) 0.3666(5) 0.2467(6) 0.075(3) Uani 1 1 d . . . 
H20 H 0.9416 0.3358 0.2188 0.090 Uiso 1 1 calc R . . 
C21 C 0.8769(11) 0.3584(6) 0.3283(7) 0.094(3) Uani 1 1 d . . . 
H21 H 0.9385 0.3216 0.3535 0.113 Uiso 1 1 calc R . . 
C22 C 0.7883(11) 0.4024(6) 0.3707(6) 0.088(3) Uani 1 1 d . . . 
H22 H 0.7866 0.3947 0.4242 0.105 Uiso 1 1 calc R . . 
C23 C 0.6967(8) 0.4612(5) 0.3324(5) 0.059(2) Uani 1 1 d . . . 
C24 C 0.6086(9) 0.5096(5) 0.3755(4) 0.066(2) Uani 1 1 d . . . 
H24 H 0.6088 0.5015 0.4290 0.079 Uiso 1 1 calc R . . 
C25 C 0.5204(7) 0.5693(5) 0.3423(4) 0.0502(19) Uani 1 1 d . . . 
C26 C 0.4292(9) 0.6196(6) 0.3858(5) 0.073(3) Uani 1 1 d . . . 
H26 H 0.4278 0.6121 0.4394 0.087 Uiso 1 1 calc R . . 
C27 C 0.3455(9) 0.6771(6) 0.3523(6) 0.081(3) Uani 1 1 d . . . 
H27 H 0.2864 0.7086 0.3820 0.098 Uiso 1 1 calc R . . 
C28 C 0.3487(8) 0.6893(5) 0.2707(5) 0.067(2) Uani 1 1 d . . . 
H28 H 0.2937 0.7307 0.2473 0.080 Uiso 1 1 calc R . . 
C29 C 0.4290(7) 0.6425(5) 0.2266(4) 0.057(2) Uani 1 1 d . . . 
H29 H 0.4262 0.6512 0.1731 0.068 Uiso 1 1 calc R . . 
C30 C 0.5191(7) 0.5794(4) 0.2590(4) 0.0417(17) Uani 1 1 d . . . 
  
loop_ 
 _atom_site_aniso_label 
 _atom_site_aniso_U_11 
 _atom_site_aniso_U_22 
 _atom_site_aniso_U_33 
 _atom_site_aniso_U_23 
 _atom_site_aniso_U_13 
 _atom_site_aniso_U_12 
Au1 0.03460(15) 0.05889(19) 0.05075(17) 0.00537(18) 0.00268(10) 0.00667(18) 
Cl1 0.0352(12) 0.1066(17) 0.0898(15) 0.0197(14) 0.0010(10) 0.0095(12) 
P1 0.0349(10) 0.0423(11) 0.0434(10) 0.0039(9) 0.0032(8) 0.0061(9) 
N1 0.032(3) 0.040(4) 0.045(4) 0.006(3) 0.003(3) -0.001(3) 
C1 0.041(4) 0.037(4) 0.041(4) -0.002(3) 0.001(3) 0.011(3) 
C2 0.054(5) 0.054(5) 0.057(5) 0.006(4) -0.001(4) 0.009(5) 
C3 0.081(7) 0.044(5) 0.063(6) -0.014(4) -0.005(5) 0.012(5) 
C4 0.068(7) 0.045(5) 0.101(7) -0.002(5) -0.016(5) -0.008(5) 
C5 0.056(5) 0.056(5) 0.089(7) -0.001(4) 0.005(5) -0.017(5) 
C6 0.046(5) 0.057(5) 0.060(5) -0.003(4) 0.003(4) 0.008(4) 
C7 0.042(4) 0.038(4) 0.050(5) 0.002(3) 0.003(3) 0.003(3) 
C8 0.074(6) 0.051(5) 0.058(6) 0.001(4) 0.004(4) 0.013(4) 
C9 0.088(7) 0.081(7) 0.045(6) -0.005(5) 0.000(5) 0.001(5) 
C10 0.072(6) 0.066(6) 0.071(7) -0.012(5) 0.025(5) -0.006(5) 
C11 0.058(6) 0.068(6) 0.078(7) -0.008(5) 0.010(5) 0.017(5) 
C12 0.046(5) 0.060(5) 0.057(5) -0.006(4) 0.009(4) 0.010(4) 
C13 0.031(4) 0.049(5) 0.059(5) 0.011(4) 0.001(3) -0.001(3) 
C14 0.047(5) 0.064(5) 0.079(6) 0.002(5) -0.007(4) -0.017(4) 
C15 0.109(8) 0.093(8) 0.120(8) -0.003(6) -0.055(7) -0.012(6) 
C16 0.037(4) 0.048(5) 0.048(5) -0.002(3) 0.000(3) 0.000(3) 
C17 0.041(4) 0.036(4) 0.047(5) -0.001(3) 0.002(3) -0.008(3) 
C18 0.044(5) 0.047(5) 0.049(5) 0.005(4) -0.005(4) -0.013(4) 
C19 0.062(6) 0.036(5) 0.075(6) 0.003(4) 0.003(4) 0.001(4) 
C20 0.070(6) 0.046(5) 0.109(8) -0.003(5) -0.003(6) 0.009(5) 
C21 0.091(8) 0.061(7) 0.127(10) 0.004(6) -0.047(7) 0.007(5) 
C22 0.104(9) 0.081(8) 0.075(7) 0.013(6) -0.039(6) 0.000(6) 
C23 0.050(5) 0.048(5) 0.075(7) 0.001(5) -0.021(5) -0.005(4) 
C24 0.072(6) 0.082(7) 0.044(5) 0.006(5) -0.007(4) -0.027(5) 
C25 0.043(5) 0.056(5) 0.052(5) -0.010(4) 0.001(4) -0.016(4) 
C26 0.067(6) 0.099(8) 0.053(6) -0.025(5) 0.018(5) -0.027(6) 
C27 0.064(6) 0.083(7) 0.098(8) -0.039(6) 0.020(5) -0.007(6) 
C28 0.041(5) 0.068(6) 0.091(7) -0.020(5) 0.001(4) 0.006(4) 
C29 0.047(5) 0.067(6) 0.057(5) -0.012(4) 0.008(4) 0.003(4) 
C30 0.034(4) 0.044(4) 0.047(5) -0.001(3) 0.000(3) -0.014(3) 
  
_geom_special_details 
; 
 All esds (except the esd in the dihedral angle between two l.s. planes) 
 are estimated using the full covariance matrix.  The cell esds are taken 
 into account individually in the estimation of esds in distances, angles 
 and torsion angles; correlations between esds in cell parameters are only 
 used when they are defined by crystal symmetry.  An approximate (isotropic) 
 treatment of cell esds is used for estimating esds involving l.s. planes. 
; 
  
loop_ 
 _geom_bond_atom_site_label_1 
 _geom_bond_atom_site_label_2 
 _geom_bond_distance 
 _geom_bond_site_symmetry_2 
 _geom_bond_publ_flag 
Au1 P1 2.2340(18) . ? 
Au1 Cl1 2.2866(19) . ? 
P1 N1 1.656(5) . ? 
P1 C7 1.795(7) . ? 
P1 C1 1.803(7) . ? 
N1 C13 1.481(7) . ? 
N1 C16 1.481(7) . ? 
C1 C6 1.375(9) . ? 
C1 C2 1.401(9) . ? 
C2 C3 1.372(9) . ? 
C2 H2 0.9300 . ? 
C3 C4 1.361(10) . ? 
C3 H3 0.9300 . ? 
C4 C5 1.362(10) . ? 
C4 H4 0.9300 . ? 
C5 C6 1.385(9) . ? 
C5 H5 0.9300 . ? 
C6 H6 0.9300 . ? 
C7 C12 1.372(8) . ? 
C7 C8 1.385(8) . ? 
C8 C9 1.369(10) . ? 
C8 H8 0.9300 . ? 
C9 C10 1.373(10) . ? 
C9 H9 0.9300 . ? 
C10 C11 1.367(10) . ? 
C10 H10 0.9300 . ? 
C11 C12 1.398(9) . ? 
C11 H11 0.9300 . ? 
C12 H12 0.9300 . ? 
C13 C14 1.551(9) . ? 
C13 H13A 0.9700 . ? 
C13 H13B 0.9700 . ? 
C14 C15 1.477(9) . ? 
C14 H14A 0.9700 . ? 
C14 H14B 0.9700 . ? 
C15 H15A 0.9600 . ? 
C15 H15B 0.9600 . ? 
C15 H15C 0.9600 . ? 
C16 C17 1.497(8) . ? 
C16 H16A 0.9700 . ? 
C16 H16B 0.9700 . ? 
C17 C30 1.402(9) . ? 
C17 C18 1.431(9) . ? 
C18 C19 1.410(9) . ? 
C18 C23 1.430(9) . ? 
C19 C20 1.362(9) . ? 
C19 H19 0.9300 . ? 
C20 C21 1.410(12) . ? 
C20 H20 0.9300 . ? 
C21 C22 1.345(12) . ? 
C21 H21 0.9300 . ? 
C22 C23 1.431(10) . ? 
C22 H22 0.9300 . ? 
C23 C24 1.387(10) . ? 
C24 C25 1.386(10) . ? 
C24 H24 0.9300 . ? 
C25 C26 1.427(10) . ? 
C25 C30 1.441(9) . ? 
C26 C27 1.338(11) . ? 
C26 H26 0.9300 . ? 
C27 C28 1.418(10) . ? 
C27 H27 0.9300 . ? 
C28 C29 1.337(9) . ? 
C28 H28 0.9300 . ? 
C29 C30 1.429(9) . ? 
C29 H29 0.9300 . ? 
  
loop_ 
 _geom_angle_atom_site_label_1 
 _geom_angle_atom_site_label_2 
 _geom_angle_atom_site_label_3 
 _geom_angle 
 _geom_angle_site_symmetry_1 
 _geom_angle_site_symmetry_3 
 _geom_angle_publ_flag 
P1 Au1 Cl1 178.37(7) . . ? 
N1 P1 C7 110.8(3) . . ? 
N1 P1 C1 104.8(3) . . ? 
C7 P1 C1 104.2(3) . . ? 
N1 P1 Au1 112.96(19) . . ? 
C7 P1 Au1 109.9(2) . . ? 
C1 P1 Au1 113.8(2) . . ? 
C13 N1 C16 114.9(5) . . ? 
C13 N1 P1 121.7(4) . . ? 
C16 N1 P1 118.5(4) . . ? 
C6 C1 C2 117.1(6) . . ? 
C6 C1 P1 123.2(5) . . ? 
C2 C1 P1 119.7(6) . . ? 
C3 C2 C1 121.3(7) . . ? 
C3 C2 H2 119.4 . . ? 
C1 C2 H2 119.4 . . ? 
C4 C3 C2 119.6(7) . . ? 
C4 C3 H3 120.2 . . ? 
C2 C3 H3 120.2 . . ? 
C3 C4 C5 121.0(8) . . ? 
C3 C4 H4 119.5 . . ? 
C5 C4 H4 119.5 . . ? 
C4 C5 C6 119.3(8) . . ? 
C4 C5 H5 120.4 . . ? 
C6 C5 H5 120.4 . . ? 
C1 C6 C5 121.7(7) . . ? 
C1 C6 H6 119.2 . . ? 
C5 C6 H6 119.2 . . ? 
C12 C7 C8 117.4(6) . . ? 
C12 C7 P1 122.6(5) . . ? 
C8 C7 P1 120.0(5) . . ? 
C9 C8 C7 122.3(7) . . ? 
C9 C8 H8 118.9 . . ? 
C7 C8 H8 118.9 . . ? 
C8 C9 C10 119.2(8) . . ? 
C8 C9 H9 120.4 . . ? 
C10 C9 H9 120.4 . . ? 
C11 C10 C9 120.7(8) . . ? 
C11 C10 H10 119.7 . . ? 
C9 C10 H10 119.7 . . ? 
C10 C11 C12 119.1(8) . . ? 
C10 C11 H11 120.5 . . ? 
C12 C11 H11 120.5 . . ? 
C7 C12 C11 121.4(7) . . ? 
C7 C12 H12 119.3 . . ? 
C11 C12 H12 119.3 . . ? 
N1 C13 C14 112.8(5) . . ? 
N1 C13 H13A 109.0 . . ? 
C14 C13 H13A 109.0 . . ? 
N1 C13 H13B 109.0 . . ? 
C14 C13 H13B 109.0 . . ? 
H13A C13 H13B 107.8 . . ? 
C15 C14 C13 111.6(7) . . ? 
C15 C14 H14A 109.3 . . ? 
C13 C14 H14A 109.3 . . ? 
C15 C14 H14B 109.3 . . ? 
C13 C14 H14B 109.3 . . ? 
H14A C14 H14B 108.0 . . ? 
C14 C15 H15A 109.5 . . ? 
C14 C15 H15B 109.5 . . ? 
H15A C15 H15B 109.5 . . ? 
C14 C15 H15C 109.5 . . ? 
H15A C15 H15C 109.5 . . ? 
H15B C15 H15C 109.5 . . ? 
N1 C16 C17 113.4(5) . . ? 
N1 C16 H16A 108.9 . . ? 
C17 C16 H16A 108.9 . . ? 
N1 C16 H16B 108.9 . . ? 
C17 C16 H16B 108.9 . . ? 
H16A C16 H16B 107.7 . . ? 
C30 C17 C18 120.1(6) . . ? 
C30 C17 C16 119.3(6) . . ? 
C18 C17 C16 120.6(6) . . ? 
C19 C18 C23 117.5(7) . . ? 
C19 C18 C17 124.1(7) . . ? 
C23 C18 C17 118.3(7) . . ? 
C20 C19 C18 121.6(8) . . ? 
C20 C19 H19 119.2 . . ? 
C18 C19 H19 119.2 . . ? 
C19 C20 C21 119.8(9) . . ? 
C19 C20 H20 120.1 . . ? 
C21 C20 H20 120.1 . . ? 
C22 C21 C20 121.8(9) . . ? 
C22 C21 H21 119.1 . . ? 
C20 C21 H21 119.1 . . ? 
C21 C22 C23 119.2(9) . . ? 
C21 C22 H22 120.4 . . ? 
C23 C22 H22 120.4 . . ? 
C24 C23 C18 120.0(7) . . ? 
C24 C23 C22 120.1(9) . . ? 
C18 C23 C22 119.9(8) . . ? 
C25 C24 C23 123.0(7) . . ? 
C25 C24 H24 118.5 . . ? 
C23 C24 H24 118.5 . . ? 
C24 C25 C26 123.8(8) . . ? 
C24 C25 C30 117.6(7) . . ? 
C26 C25 C30 118.6(7) . . ? 
C27 C26 C25 122.4(8) . . ? 
C27 C26 H26 118.8 . . ? 
C25 C26 H26 118.8 . . ? 
C26 C27 C28 118.8(8) . . ? 
C26 C27 H27 120.6 . . ? 
C28 C27 H27 120.6 . . ? 
C29 C28 C27 121.5(8) . . ? 
C29 C28 H28 119.3 . . ? 
C27 C28 H28 119.3 . . ? 
C28 C29 C30 122.2(8) . . ? 
C28 C29 H29 118.9 . . ? 
C30 C29 H29 118.9 . . ? 
C17 C30 C29 122.7(7) . . ? 
C17 C30 C25 120.8(7) . . ? 
C29 C30 C25 116.4(7) . . ? 
  
loop_ 
 _geom_torsion_atom_site_label_1 
 _geom_torsion_atom_site_label_2 
 _geom_torsion_atom_site_label_3 
 _geom_torsion_atom_site_label_4 
 _geom_torsion 
 _geom_torsion_site_symmetry_1 
 _geom_torsion_site_symmetry_2 
 _geom_torsion_site_symmetry_3 
 _geom_torsion_site_symmetry_4 
 _geom_torsion_publ_flag 
Cl1 Au1 P1 N1 -152(3) . . . . ? 
Cl1 Au1 P1 C7 -28(3) . . . . ? 
Cl1 Au1 P1 C1 89(3) . . . . ? 
C7 P1 N1 C13 70.7(5) . . . . ? 
C1 P1 N1 C13 -41.1(5) . . . . ? 
Au1 P1 N1 C13 -165.4(4) . . . . ? 
C7 P1 N1 C16 -83.2(5) . . . . ? 
C1 P1 N1 C16 165.0(5) . . . . ? 
Au1 P1 N1 C16 40.6(5) . . . . ? 
N1 P1 C1 C6 99.0(6) . . . . ? 
C7 P1 C1 C6 -17.4(6) . . . . ? 
Au1 P1 C1 C6 -137.1(5) . . . . ? 
N1 P1 C1 C2 -78.4(5) . . . . ? 
C7 P1 C1 C2 165.2(5) . . . . ? 
Au1 P1 C1 C2 45.5(6) . . . . ? 
C6 C1 C2 C3 -1.5(10) . . . . ? 
P1 C1 C2 C3 176.0(5) . . . . ? 
C1 C2 C3 C4 3.0(11) . . . . ? 
C2 C3 C4 C5 -3.1(12) . . . . ? 
C3 C4 C5 C6 1.8(12) . . . . ? 
C2 C1 C6 C5 0.3(10) . . . . ? 
P1 C1 C6 C5 -177.2(5) . . . . ? 
C4 C5 C6 C1 -0.4(11) . . . . ? 
N1 P1 C7 C12 -1.4(7) . . . . ? 
C1 P1 C7 C12 110.8(6) . . . . ? 
Au1 P1 C7 C12 -126.9(5) . . . . ? 
N1 P1 C7 C8 177.0(5) . . . . ? 
C1 P1 C7 C8 -70.8(6) . . . . ? 
Au1 P1 C7 C8 51.4(6) . . . . ? 
C12 C7 C8 C9 -0.4(11) . . . . ? 
P1 C7 C8 C9 -178.9(6) . . . . ? 
C7 C8 C9 C10 0.3(12) . . . . ? 
C8 C9 C10 C11 0.2(13) . . . . ? 
C9 C10 C11 C12 -0.6(12) . . . . ? 
C8 C7 C12 C11 0.0(10) . . . . ? 
P1 C7 C12 C11 178.4(6) . . . . ? 
C10 C11 C12 C7 0.5(11) . . . . ? 
C16 N1 C13 C14 -96.0(6) . . . . ? 
P1 N1 C13 C14 109.2(6) . . . . ? 
N1 C13 C14 C15 156.9(7) . . . . ? 
C13 N1 C16 C17 55.6(7) . . . . ? 
P1 N1 C16 C17 -148.7(5) . . . . ? 
N1 C16 C17 C30 75.1(7) . . . . ? 
N1 C16 C17 C18 -103.9(7) . . . . ? 
C30 C17 C18 C19 -176.7(7) . . . . ? 
C16 C17 C18 C19 2.3(10) . . . . ? 
C30 C17 C18 C23 0.1(9) . . . . ? 
C16 C17 C18 C23 179.1(6) . . . . ? 
C23 C18 C19 C20 -0.8(10) . . . . ? 
C17 C18 C19 C20 176.1(7) . . . . ? 
C18 C19 C20 C21 2.0(12) . . . . ? 
C19 C20 C21 C22 -0.5(14) . . . . ? 
C20 C21 C22 C23 -2.1(15) . . . . ? 
C19 C18 C23 C24 178.9(7) . . . . ? 
C17 C18 C23 C24 1.8(10) . . . . ? 
C19 C18 C23 C22 -1.9(10) . . . . ? 
C17 C18 C23 C22 -179.0(7) . . . . ? 
C21 C22 C23 C24 -177.4(9) . . . . ? 
C21 C22 C23 C18 3.4(13) . . . . ? 
C18 C23 C24 C25 -2.7(11) . . . . ? 
C22 C23 C24 C25 178.1(7) . . . . ? 
C23 C24 C25 C26 -180.0(7) . . . . ? 
C23 C24 C25 C30 1.5(11) . . . . ? 
C24 C25 C26 C27 179.7(8) . . . . ? 
C30 C25 C26 C27 -1.8(11) . . . . ? 
C25 C26 C27 C28 -0.7(13) . . . . ? 
C26 C27 C28 C29 2.6(12) . . . . ? 
C27 C28 C29 C30 -1.9(12) . . . . ? 
C18 C17 C30 C29 178.1(6) . . . . ? 
C16 C17 C30 C29 -1.0(10) . . . . ? 
C18 C17 C30 C25 -1.3(9) . . . . ? 
C16 C17 C30 C25 179.7(5) . . . . ? 
C28 C29 C30 C17 179.9(7) . . . . ? 
C28 C29 C30 C25 -0.7(10) . . . . ? 
C24 C25 C30 C17 0.5(10) . . . . ? 
C26 C25 C30 C17 -178.1(6) . . . . ? 
C24 C25 C30 C29 -178.9(6) . . . . ? 
C26 C25 C30 C29 2.5(9) . . . . ? 
  
_diffrn_measured_fraction_theta_max    0.998 
_diffrn_reflns_theta_full              26.39 
_diffrn_measured_fraction_theta_full   0.998 
_refine_diff_density_max    0.836 
_refine_diff_density_min   -0.743 
_refine_diff_density_rms    0.119 
